# Supplementary material for: Jacobsen Catalyst as a Cytochrome P450 Biomimetic Model for the Metabolism of Monensin A
Source: Hindawi journal article supplement (doi:10.1155/2014/152102), 2014-01-01
Supplement: f1 [file 152102.f1.pdf]

## Supplementary Materials

### Jacobsen catalyst as a cytochrome P450 biomimetic model for the metabolism of monensin A

Bruno Alves Rocha,<sup>1</sup> Anderson Rodrigo Moraes de Oliveira,<sup>1</sup> Murilo Pazin,<sup>2</sup> Daniel Junqueira Dorta,<sup>1</sup> Andresa Piacezzi Nascimento Rodrigues,<sup>3</sup> Andresa Aparecida Berretta,<sup>3</sup> Ana Paula Ferranti Peti,<sup>1</sup> Luiz Alberto Beraldo de Moraes,<sup>1</sup> Norberto Peporine Lopes,<sup>4</sup> Stanislav Pospíšil,<sup>5</sup> Paul Jonathan Gates,<sup>6</sup> Marilda das Dores Assis<sup>1\*</sup>

#### Affiliation

<sup>1</sup> Departamento de Química, Faculdade de Filosofia, Ciências e Letras de Ribeirão Preto. Universidade de São Paulo, Ribeirão Preto, Brazil.

<sup>2</sup> Departamento de Análises Clínicas, Toxicológicas e Bromatológicas, Faculdade de Ciências Farmacêuticas de Ribeirão Preto, Universidade de São Paulo, Ribeirão Preto Brazil.

<sup>3</sup> Laboratório de Pesquisa, Desenvolvimento e Inovação, Apis Flora Industrial e Comercial LTDA, Ribeirão Preto, Brazil.

<sup>4</sup> Núcleo de Pesquisas em Produtos Naturais e Sintéticos, Faculdade de Ciências Farmacêuticas de Ribeirão Preto, Universidade de São Paulo, Ribeirão Preto Brazil.

<sup>5</sup> Institute of Microbiology, Academy of Sciences of the Czech Republic (ASCR), Vídeňská, Prague, Czech Republic.

<sup>6</sup> School of Chemistry, University of Bristol, Bristol, United Kingdom

#### Correspondence

##### Prof. Dr. Marilda das Dores Assis

Departamento de Química, Faculdade de Filosofia, Ciências e Letras de Ribeirão Preto, Universidade de São Paulo.

Avenida dos Bandeirantes, 3900. 14040-901, Ribeirão Preto, SP, Brazil

Phone: +55-16-3602-0388. Fax: +55-16-3602- 4838.

E-mail: mddassis@usp.br

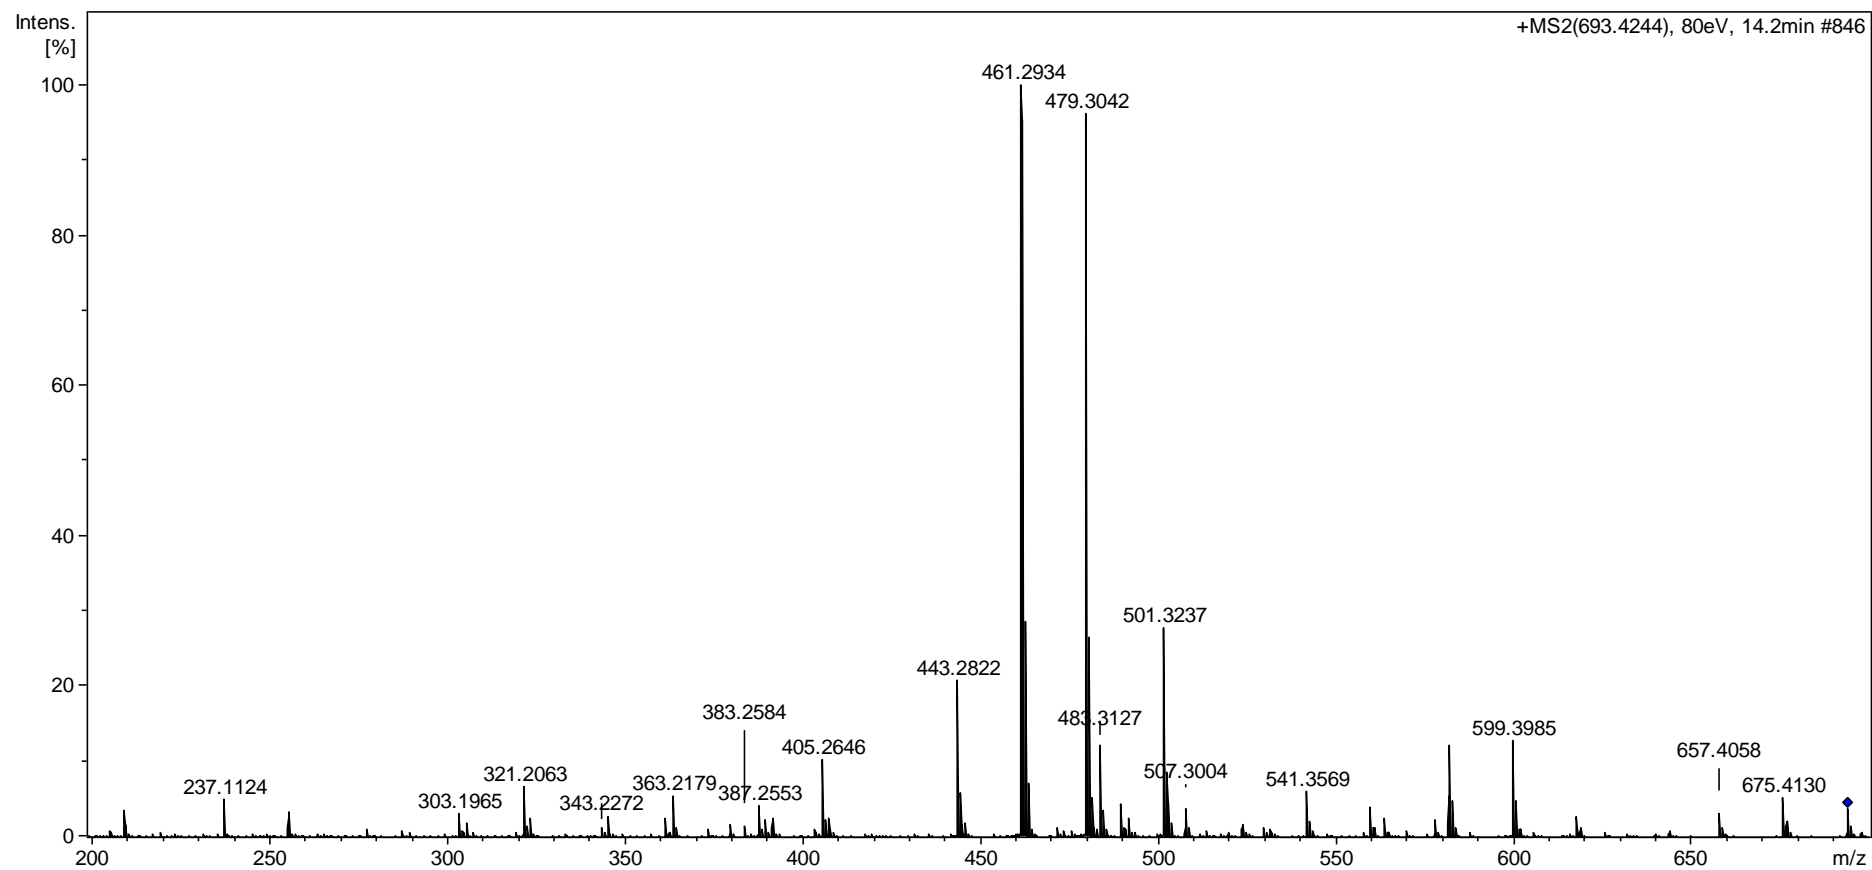

Figure S1: ESI-MS/MS product ion spectrum of monensin A.

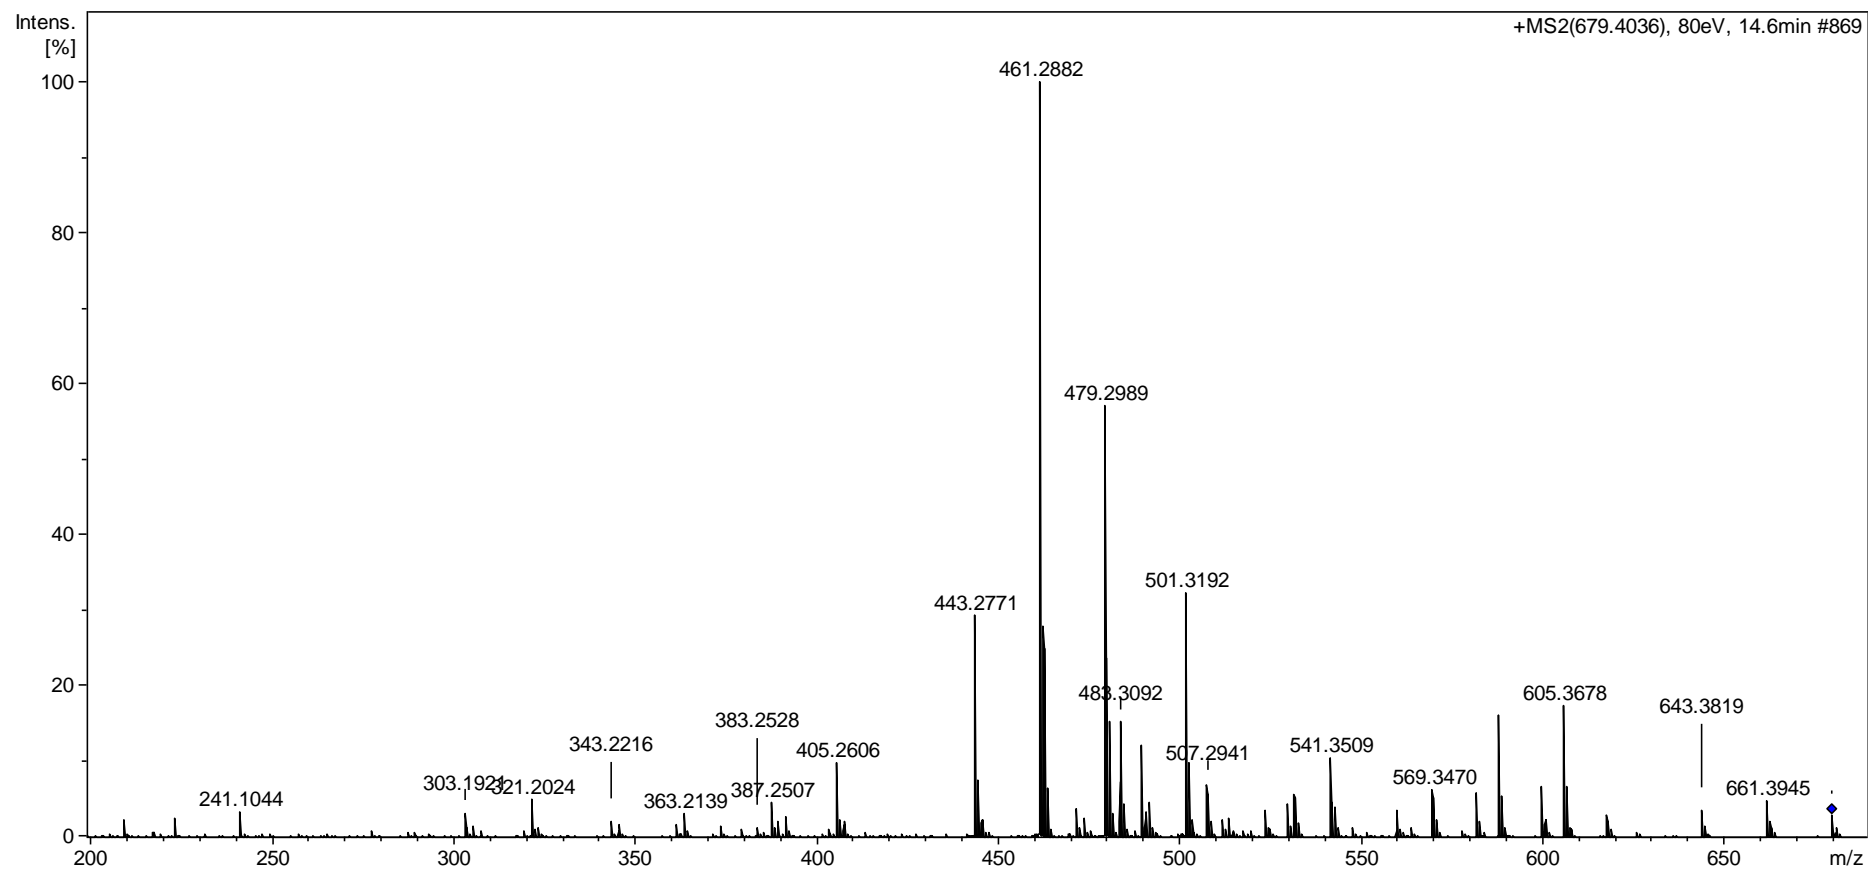

Figure S2: ESI-MS/MS product ion spectrum of metabolite 1 ( $m/z$  679)

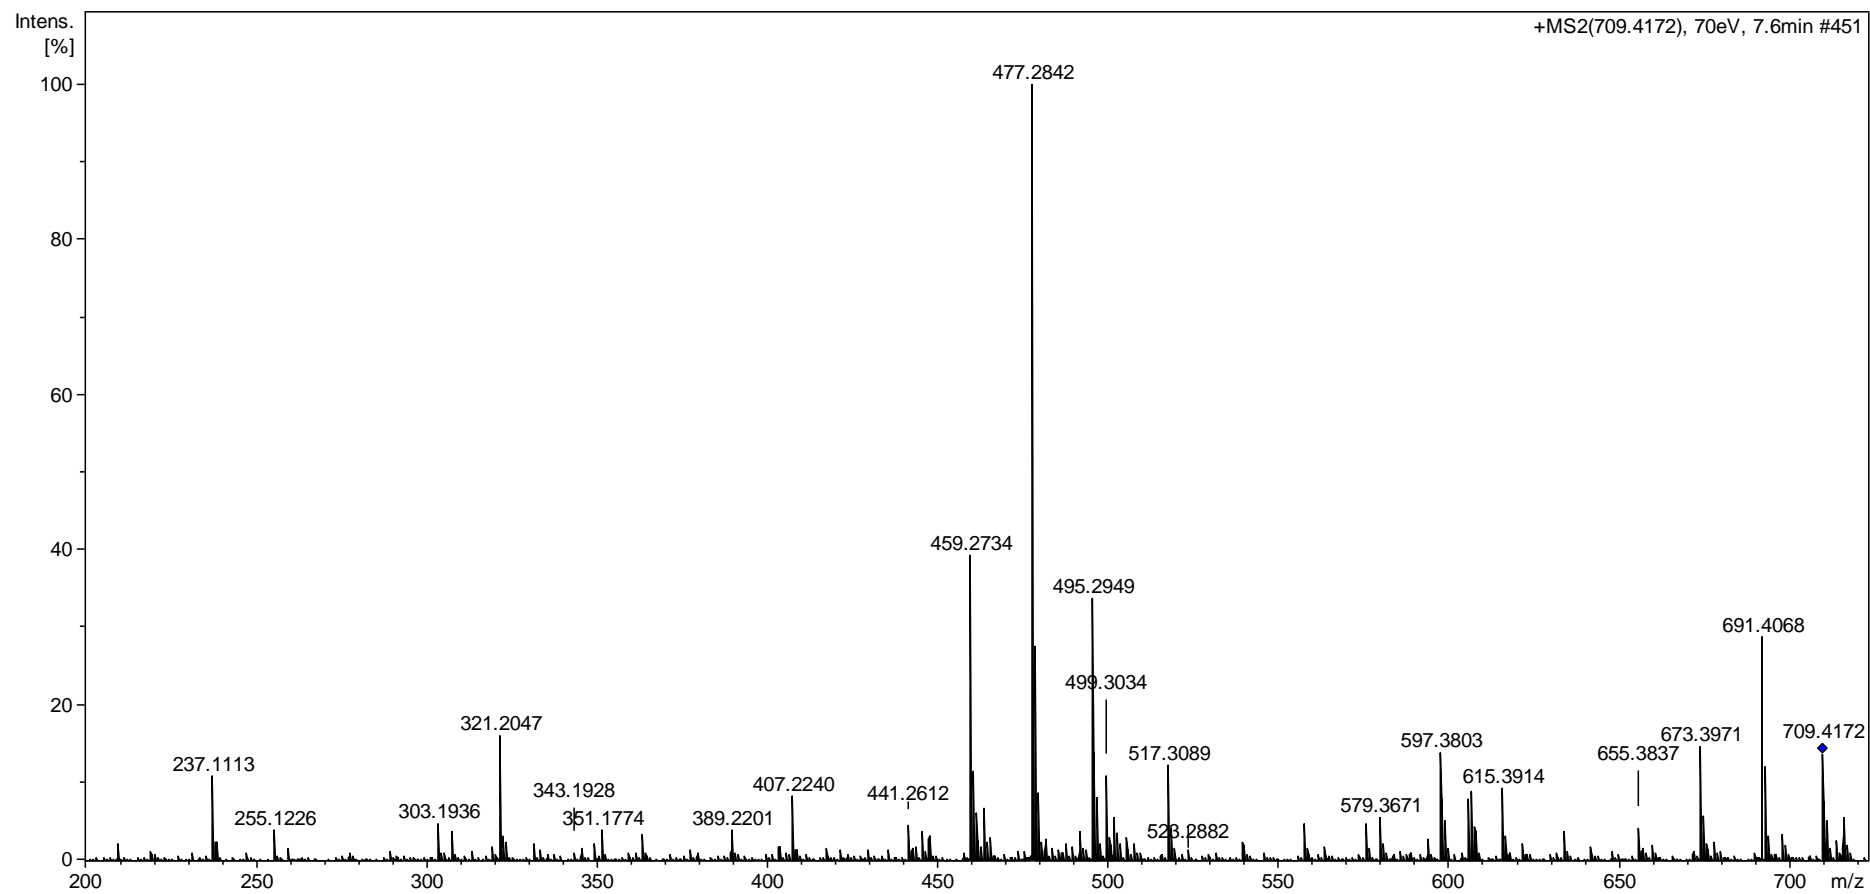

Figure S3: ESI-MS/MS product ion spectrum of metabolite 2 ( $m/z$  709).
